# Supplementary material for: Life‐Cycle Assessment of High‐Strength Concrete Mixtures with Copper Slag as Sand Replacement
Source: Hindawi journal article supplement (doi:10.1155/2019/6815348), 2019-01-01
Supplement: f1 [file 6815348.f1.docx]

Table A.1 Net electricity generation by fuel type for Singapore and countries importing materials by percent

|  | **Coal** | **Natural gas** | **Oil** | **Nuclear** | **Hydro electric** | **Solar** | **Wind** | **Biomass or other** | **Geo**  **thermal** |
| --- | --- | --- | --- | --- | --- | --- | --- | --- | --- |
| China | 76 | 2 | 0.1 | 2 | 17.3 | 1.8 | 0.1 | 0.7 |  |
| Japan* | 30 | 43 | 15 | 1 | 9 | 0.8 | 0.1 | 0.9 | 0.2 |
| Indonesia | 49 | 16 | 23 |  | 7 |  |  |  | 5 |
| Malaysia | 41.5 | 46.6 | 4.5 |  | 6.7 |  |  | 0.7 |  |
| Singapore |  | 91.5 | 5 |  |  |  |  | 3.5 |  |
| Taiwan | 50 | 25 | 3.1 | 16.1 | 3.5 | 0.6 | 0.2 | 1.5 |  |
| Thailand | 20 | 70 | 2 |  | 5 |  |  | 3.0 |  |
| Myanmar | 4.3 | 20.5 | 0.5 |  | 74.7 |  |  |  |  |
| Vietnam | 19.5 | 33.6 | 1.8 |  | 45 |  | 0.07 | 0.05 |  |
| Philippines | 42.6 | 24.97 | 5.97 |  | 13.31 |  | 0.09 | 0.28 | 12.76 |
| Cambodia | 9.6 |  | 32.6 |  | 57.2 |  |  | 0.6 |  |
| OECD/IEA Statistics for countries <http://www.iea.org/statistics/>, accessed on November 25, 2015  *except for Japan (JEPIC 2014) | | | | | | | | | |

*Table A.2 LCI data for the cement production in the country of origin and transportation to Singapore (calculated using GreenConcrete LCA tool, (Gursel, 2014))*

|  | **Japan, 56%** | | **China, 11%** | | **Taiwan, 17%** | | **Malaysia, 16%** | |
| --- | --- | --- | --- | --- | --- | --- | --- | --- |
| per tonne of Portland cement | **Cement Production** | **Transportation** | **Cement Production** | **Transportation** | **Cement Production** | **Transportation** | **Cement Production** | **Transportation** |
| Electricity Use (MJ) | 1,519.83 | - | 1,507.92 | - | 1,685.01 | - | 1,540.39 | - |
| Water Consumption (m3) | 121.27 | - | 167.86 | - | 169.70 | - | 114.67 | - |
| Energy (Fuel) Use (MJ) | 3,368.98 | 1,273.39 | 4,383.79 | 824.97 | 4,383.79 | 949.53 | 3,342.69 | 244.52 |
| Solid Waste Generation (kg) | 49.93 | - | 67.38 | - | 64.13 | - | 50.65 | - |
| Total Air Emissions (kg) |  |  |  |  |  |  |  |  |
| GWP (CO2-eq) | 1,140.99 | 103.00 | 1,317.98 | 72.05 | 1,301.67 | 80.64 | 1,136.38 | 31.98 |
| Antimony (Sb) | 0.60 | - | 0.61 | - | 0.61 | - | 0.61 | - |
| Arsenic (As) | 0.00 | - | 0.00 | - | 0.00 | - | 0.00 | - |
| Beryllium (Be) | 0.00 | - | 0.00 | - | 0.00 | - | 0.00 | - |
| Cadmium (Cd) | 0.00 | - | 0.00 | - | 0.00 | - | 0.00 | - |
| Carbon Dioxide (CO2) | 1,126.84 | 99.87 | 1,307.47 | 70.17 | 1,287.73 | 78.42 | 1,123.72 | 31.72 |
| Carbon Monoxide (CO) | 0.15 | 0.08 | 0.24 | 0.08 | 0.24 | 0.08 | 0.16 | 0.08 |
| Chromium (Cr) | 0.00 | - | 0.00 | - | 0.00 | - | 0.00 | - |
| Cobalt (Co) | 0.00 | - | 0.00 | - | 0.00 | - | 0.00 | - |
| Copper (Cu) | 0.00 | - | 0.00 | - | 0.00 | - | 0.00 | - |
| Formaldehyde | 0.00 | - | 0.00 | - | 0.00 | - | 0.00 | - |
| Lead (Pb) | 0.00 | - | 0.00 | - | 0.00 | - | 0.00 | - |
| Manganese (Mn) | 0.00 | - | 0.00 | - | 0.00 | - | 0.00 | - |
| Mercury (Hg) | 0.00 | - | 0.00 | - | 0.00 | - | 0.00 | - |
| Methane (CH4) | 0.77 | - | 0.77 | - | 0.83 | - | 0.74 | - |
| Nickel (Ni) | 0.00 | - | 0.00 | - | 0.00 | - | 0.00 | - |
| Nitrogen Oxides (NOX) | 5.98 | 2.06 | 7.79 | 1.38 | 7.73 | 1.57 | 5.83 | 0.49 |
| Nitrous Oxide (N2O) | 0.25 | - | 0.01 | - | 0.06 | - | 0.08 | - |
| Non Methane VOCs | 0.04 | - | 0.03 | - | 0.04 | - | 0.05 | - |
| Particulates (PM10) | 1.36 | 0.05 | 1.49 | 0.05 | 1.49 | 0.05 | 1.38 | 0.05 |
| Particulates (total) | 0.47 | - | 0.92 | - | 0.68 | - | 0.54 | - |
| Selenium (Se) | 0.00 | - | 0.00 | - | 0.00 | - | 0.00 | - |
| Sulfur Dioxide (SO2) | 3.25 | 0.35 | 4.02 | 0.22 | 3.91 | 0.25 | 3.15 | 0.05 |
| VOCs (unspecified) | 0.01 | - | 0.02 | - | 0.02 | - | 0.01 | - |
| Zinc (Zn) | 0.00 | - | 0.00 | - | 0.00 | - | 0.00 | - |

Table A.3 LCI data for fine aggregates (sand) production in the country of origin and transportation to Singapore (calculated using GreenConcrete LCA tool, (Gursel, 2014))

|  | **Malaysia, 9%** | | **Vietnam, 29%** | | **Myanmar, 11%** | | **Cambodia, 45%** | | **Philippines, 6%** | |
| --- | --- | --- | --- | --- | --- | --- | --- | --- | --- | --- |
| per tonne of fine aggregate (sand) | **Fine aggregates production** | **Transportation** | **Fine aggregates production** | **Transportation** | **Fine aggregates production** | **Transportation** | **Fine aggregates production** | **Transportation** | **Fine aggregates production** | **Transportation** |
| Electricity Use (MJ) | 24.80 | - | 14.36 | - | 6.43 | - | 13.02 | - | 28.05 | - |
| Water Consumption (m3) | 104.16 | - | 117.99 | - | 133.08 | - | 143.19 | - | 135.48 | - |
| Energy (Fuel) Use (MJ) | 13.69 | 244.52 | 13.69 | 353.94 | 13.69 | 578.65 | 13.69 | 437.40 | 13.69 | 678.30 |
| Solid Waste Generation (kg) | 0.11 | - | 0.06 | - | 0.03 | - | 0.04 | - | 0.11 | - |
| Total Air Emissions (kg) |  |  |  |  |  |  |  |  |  |  |
| GWP (CO2-eq) | 2.68 | 31.98 | 1.96 | 31.98 | 1.42 | 47.49 | 1.96 | 37.74 | 2.49 | 54.37 |
| Antimony (Sb) | 0.00 | - | 0.00 | - | 0.00 | - | 0.00 | - | 0.00 | - |
| Arsenic (As) | 0.00 | - | 0.00 | - | 0.00 | - | 0.00 | - | 0.00 | - |
| Beryllium (Be) | 0.00 | - | 0.00 | - | 0.00 | - | 0.00 | - | 0.00 | - |
| Cadmium (Cd) | 0.00 | - | 0.00 | - | 0.00 | - | 0.00 | - | 0.00 | - |
| Carbon Dioxide (CO2) | 2.62 | 31.72 | 1.89 | 31.21 | 1.34 | 46.09 | 1.89 | 36.73 | 2.46 | 52.69 |
| Carbon Monoxide (CO) | 0.01 | 0.08 | 0.01 | 0.04 | 0.01 | 0.04 | 0.01 | 0.04 | 0.01 | 0.04 |
| Chromium (Cr) | 0.00 | - | 0.00 | - | 0.00 | - | 0.00 | - | 0.00 | - |
| Cobalt (Co) | 0.00 | - | 0.00 | - | 0.00 | - | 0.00 | - | 0.00 | - |
| Copper (Cu) | 0.00 | - | 0.00 | - | 0.00 | - | 0.00 | - | 0.00 | - |
| Formaldehyde | 0.00 | - | 0.00 | - | 0.00 | - | 0.00 | - | 0.00 | - |
| Lead (Pb) | 0.00 | - | 0.00 | - | 0.00 | - | 0.00 | - | 0.00 | - |
| Manganese (Mn) | 0.00 | - | 0.00 | - | 0.00 | - | 0.00 | - | 0.00 | - |
| Mercury (Hg) | 0.00 | - | 0.00 | - | 0.00 | - | 0.00 | - | 0.00 | - |
| Methane (CH4) | 0.01 | - | 0.00 | - | 0.00 | - | 0.00 | - | 0.00 | - |
| Nickel (Ni) | 0.00 | - | 0.00 | - | 0.00 | - | 0.00 | - | 0.00 | - |
| Nitrogen Oxides (NOX) | 0.01 | 0.49 | 0.01 | 0.60 | 0.01 | 0.94 | 0.01 | 0.73 | 0.01 | 1.09 |
| Nitrous Oxide (N2O) | 0.00 | - | 0.00 | - | 0.00 | - | 0.01 | - | 0.00 | - |
| Non Methane VOCs | 0.00 | - | 0.00 | - | 0.00 | - | 0.00 | - | 0.00 | - |
| Particulates (PM10) | 0.03 | 0.05 | 0.03 | 0.02 | 0.03 | 0.02 | 0.03 | 0.02 | 0.03 | 0.02 |
| Particulates (total) | 0.01 | - | 0.00 | - | 0.00 | - | 0.00 | - | 0.01 | - |
| Selenium (Se) | 0.00 | - | 0.00 | - | 0.00 | - | 0.00 | - | 0.00 | - |
| Sulfur Dioxide (SO2) | 0.01 | 0.05 | 0.01 | 0.09 | 0.00 | 0.16 | 0.01 | 0.12 | 0.01 | 0.19 |
| VOCs (unspecified) | 0.00 | - | 0.00 | - | 0.00 | - | 0.00 | - | 0.00 | - |
| Zinc (Zn) | 0.00 | - | 0.00 | - | 0.00 | - | 0.00 | - | 0.00 | - |

Table A.4 LCI data for coarse aggregate (crushed stone) production in the country of origin and transportation to Singapore (calculated using GreenConcrete LCA tool, (Gursel, 2014))

|  | **Malaysia, 40%** | | **Indonesia, 46%** | | **China, 8%** | | **Thailand, 4%** | | **Vietnam, 2%** | |
| --- | --- | --- | --- | --- | --- | --- | --- | --- | --- | --- |
| per tonne of coarse aggregate (crushed stone) | **Coarse aggregate production** | **Transportation** | **Coarse aggregate production** | **Transportation** | **Coarse aggregate production** | **Transportation** | **Coarse aggregate production** | **Transportation** | **Coarse aggregate production** | **Transportation** |
| Electricity Use (MJ) | 32.01 | - | 36.37 | - | 31.04 | - | 31.15 | - | 18.53 | - |
| Water Consumption (m3) | 134.58 | - | 164.83 | - | 192.60 | - | 128.51 | - | 152.44 | - |
| Energy (Fuel) Use (MJ) | 21.47 | 244.52 | 21.47 | 381.54 | 21.47 | 824.97 | 21.47 | 496.13 | 21.47 | 353.94 |
| Solid Waste Generation (kg) | 0.15 | - | 0.16 | - | 0.24 | - | 0.09 | - | 0.08 | - |
| Total Air Emissions (kg) |  |  |  |  |  |  |  |  |  |  |
| GWP (CO2-eq) | 3.73 | 31.98 | 3.98 | 41.44 | 3.94 | 72.05 | 3.37 | 49.35 | 2.81 | 31.98 |
| Antimony (Sb) | 0.00 | - | 0.00 | - | 0.00 | - | 0.00 | - | 0.00 | - |
| Arsenic (As) | 0.00 | - | 0.00 | - | 0.00 | - | 0.00 | - | 0.00 | - |
| Beryllium (Be) | 0.00 | - | 0.00 | - | 0.00 | - | 0.00 | - | 0.00 | - |
| Cadmium (Cd) | 0.00 | - | 0.00 | - | 0.00 | - | 0.00 | - | 0.00 | - |
| Carbon Dioxide (CO2) | 3.64 | 31.72 | 3.92 | - | 3.98 | 70.17 | 3.25 | 48.39 | 2.70 | 31.21 |
| Carbon Monoxide (CO) | 0.01 | 0.08 | 0.01 | 40.80 | 0.01 | 0.08 | 0.01 | 0.08 | 0.01 | 0.04 |
| Chromium (Cr) | 0.00 | - | 0.00 | 0.08 | 0.00 | - | 0.00 | - | 0.00 | - |
| Cobalt (Co) | 0.00 | - | 0.00 | - | 0.00 | - | 0.00 | - | 0.00 | - |
| Copper (Cu) | 0.00 | - | 0.00 | - | 0.00 | - | 0.00 | - | 0.00 | - |
| Formaldehyde | 0.00 | - | 0.00 | - | 0.00 | - | 0.00 | - | 0.00 | - |
| Lead (Pb) | 0.00 | - | 0.00 | - | 0.00 | - | 0.00 | - | 0.00 | - |
| Manganese (Mn) | 0.00 | - | 0.00 | - | 0.00 | - | 0.00 | - | 0.00 | - |
| Mercury (Hg) | 0.00 | - | 0.00 | - | 0.00 | - | 0.00 | - | 0.00 | - |
| Methane (CH4) | 0.01 | - | 0.01 | - | 0.01 | - | 0.01 | - | 0.01 | - |
| Nickel (Ni) | 0.00 | - | 0.00 | - | 0.00 | - | 0.00 | - | 0.00 | - |
| Nitrogen Oxides (NOX) | 0.01 | 0.49 | 0.01 | - | 0.01 | 1.38 | 0.01 | 0.88 | 0.01 | 0.60 |
| Nitrous Oxide (N2O) | 0.00 | - | 0.01 | 0.70 | 0.00 | - | 0.00 | - | 0.00 | - |
| Non Methane VOCs | 0.00 | - | 0.00 | - | 0.00 | - | 0.00 | - | 0.00 | - |
| Particulates (PM10) | 0.03 | 0.05 | 0.03 | - | 0.03 | 0.05 | 0.03 | 0.05 | 0.03 | 0.02 |
| Particulates (total) | 0.01 | - | 0.01 | 0.05 | 0.01 | - | 0.00 | - | 0.00 | - |
| Selenium (Se) | 0.00 | - | 0.00 | - | 0.00 | - | 0.00 | - | 0.00 | - |
| Sulfur Dioxide (SO2) | 0.01 | 0.05 | 0.02 | - | 0.01 | 0.22 | 0.01 | 0.12 | 0.01 | 0.09 |
| VOCs (unspecified) | 0.00 | - | 0.00 | 0.09 | 0.00 | - | 0.00 | - | 0.00 | - |
| Zinc (Zn) | 0.00 | - | 0.00 | - | 0.00 | - | 0.00 | - | 0.00 | - |

Table A.5 LCI data for processing of washed copper slag (CS) at the Singapore’s shipyard and transportation to concrete plant (calculated using GreenConcrete LCA tool, (Gursel, 2014))

| per tonne of CS | **Washed CS (as fine aggregate)** | **Transportation** |
| --- | --- | --- |
| Electricity Use (MJ) | 9.13 | - |
| Water Consumption (m3) | 31.00 | 1 |
| Energy (Fuel) Use (MJ) | 15.96 | 76.17 |
| Solid Waste Generation (kg) | 0.02 | - |
| Total Air Emissions (kg) |  |  |
| GWP (CO2-eq) | 1.61 | 12.81 |
| Antimony (Sb) | - | - |
| Arsenic (As) | - | - |
| Beryllium (Be) | - | - |
| Cadmium (Cd) | - | - |
| Carbon Dioxide (CO2) | 1.54 | 12.81 |
| Carbon Monoxide (CO) | 0.01 | 0.04 |
| Chromium (Cr) | - | - |
| Cobalt (Co) | - | - |
| Copper (Cu) | - | - |
| Formaldehyde | - | - |
| Lead (Pb) | - | - |
| Manganese (Mn) | - | - |
| Mercury (Hg) | - | - |
| Methane (CH4) | - | - |
| Nickel (Ni) | - | - |
| Nitrogen Oxides (NOX) | 0.01 | 0.18 |
| Nitrous Oxide (N2O) | - | - |
| Non Methane VOCs | - | - |
| Particulates (PM10) | - | 0.02 |
| Particulates (total) | - | - |
| Selenium (Se) | - | - |
| Sulfur Dioxide (SO2) | - | 0.01 |
| VOCs (unspecified) | - | - |
| Zinc (Zn) | - | - |

Table A.6 Selected LCIA impact characterization factors (midpoint-oriented and hierarchist approach) as defined by ReCiPe method (Goedkoop et al., 2013)

|  | Acidification  (A) | Marine Eutrophication (ME) | GWP  (100 year) | Photochemical oxidant formation (POFP) | PM formation  (PM) | Freshwater ecotoxicity  (FETOX) | Human toxicity (HTOX) | Marine ecotoxicity (METOX) | Terrestrial ecotoxicity (TETOX) |
| --- | --- | --- | --- | --- | --- | --- | --- | --- | --- |
| Air emissions (units) | kg  SO2-eq | kg  N-eq | kg  CO2-eq | kg NMVOC | kg  PM10-eq | kg  1,4-DB eq | kg  1,4-DB eq | kg  1,4-DB eq | kg  1,4-DB eq |
| Antimony |  |  |  |  |  | 0.80 | 2,960.00 | 14.09 | 2.00 |
| Arsenic |  |  |  |  |  | 0.23 | 72,042.00 | 22.47 | 0.11 |
| Beryllium |  |  |  |  |  | 38.42 | 15,182.00 | 288.32 | 66.68 |
| Cadmium |  |  |  |  |  | 0.20 | 45,235.00 | 40.36 | 5.07 |
| CO2 |  |  | 1.00 |  |  |  |  |  |  |
| CO |  |  |  | 0.05 |  |  |  |  |  |
| Chromium III |  |  |  |  |  | 0.01 | 0.19 | 4.61 | 0.05 |
| Cobalt |  |  |  |  |  | 2.81 | 184.30 | 31.88 | 8.10 |
| Copper |  |  |  |  |  | 1.82 | 22.58 | 388.44 | 5.21 |
| Formaldehyde |  |  |  | 0.88 |  | 0.01 | 22.06 | 0.01 | 0.04 |
| Lead (Pb) |  |  |  |  |  | 0.01 | 16,218 | 2.24 | 0.01 |
| Manganese |  |  |  |  |  | 0.06 | 687.88 | 7.94 | 0.00 |
| Mercury |  |  |  |  |  | 2.52 | 56,578.00 | 658.94 | 78.70 |
| Methane (CH4) |  |  | 25.00 | 0.01 |  |  |  |  |  |
| Nickel (Ni) |  |  |  |  |  | 1.77 | 66.88 | 125.49 | 2.52 |
| (NOX) | 0.56 | 0.04 |  | 1.00 | 0.22 |  |  |  |  |
| (N2O) |  |  | 298.00 |  |  |  |  |  |  |
| (NMVOC) |  |  |  | 1.00 | 0.00 |  |  |  |  |
| Particulates (PM10) |  |  |  |  | 1.00 |  |  |  |  |
| SO2 |  |  |  |  | 1.00 |  |  |  |  |
| (VOC) (unspecified) |  |  |  |  |  |  |  |  |  |
| Zinc | 1.00 |  |  | 0.08 | 0.20 |  |  |  |  |
